# Supplementary material for: Dimethyl Bisphenolate Ameliorates Carbon Tetrachloride-Induced Liver Injury by Regulating Oxidative Stress-Related Genes
Source: MDPI journal article supplement (doi:10.3390/molecules28247989), 2023-12-07
Supplement: s1 [file s1]

## **Supplemental Data**

- 1. The targets of SEA, and SuperPhred in Supplemental Tables S1, S2, and file of SMILES.**
- 2. The cytotoxicity assessment of DMB.**
- 3. Supplemental methods.**

# 1. The targets of SEA, and SuperPhred in Supplemental Tables S1, S2, and file of SMILES.

**Supplemental Table S1. The targets of SEA in this study**

| Query ID    | Target ID        | Affinity Thresho ld (nM) | P- Value | Max Tc | Cut Sum | Z- Score | Name    | Description                             | Query Smiles                                                              |
|-------------|------------------|--------------------------|----------|--------|---------|----------|---------|-----------------------------------------|---------------------------------------------------------------------------|
| compou nd_1 | A0A0C7ACN7_PSEAI | 5                        | 1.20E-06 | 0.2807 | 0.2807  | 10.1813  | pqsD    | 3-oxoacyl-ACP synthase                  | <chem>COC(=O)\C=C\C1=CC=C(O)C(O)=C1\C(=C\C1=CC(O)=C(O)C=C1)C(=O)OC</chem> |
| compou nd_1 | A4_HUMAN         | 5                        | 1.81E-24 | 0.3871 | 16.5761 | 42.1741  | APP     | Amyloid-beta precursor protein          | <chem>COC(=O)\C=C\C1=CC=C(O)C(O)=C1\C(=C\C1=CC(O)=C(O)C=C1)C(=O)OC</chem> |
| compou nd_1 | AK1BA_HUMAN      | 5                        | 1.83E-23 | 0.3684 | 3.4388  | 40.3728  | AKR1B10 | Aldo-keto reductase family 1 member B10 | <chem>COC(=O)\C=C\C1=CC=C(O)C(O)=C1\C(=C\C1=CC(O)=C(O)C=C1)C(=O)OC</chem> |
| compou nd_1 | AK1C4_HUMAN      | 5                        | 1.40E-08 | 0.3559 | 0.3559  | 13.6487  | AKR1C4  | Aldo-keto reductase family 1 member C4  | <chem>COC(=O)\C=C\C1=CC=C(O)C(O)=C1\C(=C\C1=CC(O)=C(O)C=C1)C(=O)OC</chem> |
| compou nd_1 | ALDR_HUMAN       | 5                        | 3.06E-07 | 0.3684 | 3.7996  | 11.246   | AKR1B1  | Aldo-keto reductase family 1 member B1  | <chem>COC(=O)\C=C\C1=CC=C(O)C(O)=C1\C(=C\C1=CC(O)=C(O)C=C1)C(=O)OC</chem> |
| compou nd_1 | ALDR_RAT         | 5                        | 2.83E-11 | 0.3559 | 5.3218  | 18.4868  | Akr1b1  | Aldo-keto reductase family 1 member B1  | <chem>COC(=O)\C=C\C1=CC=C(O)C(O)=C1\C(=C\C1=CC(O)=C(O)C=C1)C(=O)OC</chem> |
| compou nd_1 | AOFB_MOUSE       | 5                        | 4.56E-08 | 0.3167 | 0.3167  | 12.7294  | Maob    | Amine oxidase [flavin-containing] B     | <chem>COC(=O)\C=C\C1=CC=C(O)C(O)=C1\C(=C\C1=CC(O)=C(O)C=C1)C(=O)OC</chem> |
| compou nd_1 | B4URF0_I33A0     | 5                        | 4.62E-09 | 0.3333 | 3.0877  | 14.5147  |         | Neuraminidase                           | <chem>COC(=O)\C=C\C1=CC=C(O)C(O)=C1\C(=C\C1=CC(O)=C(O)C=C1)C(=O)OC</chem> |
| compou nd_1 | CAH13_MOUSE      | 5                        | 1.96E-12 | 0.3438 | 1.5865  | 20.5709  | Ca13    | Carbonic anhydrase 13                   | <chem>COC(=O)\C=C\C1=CC=C(O)C(O)=C1\C(=C\C1=CC(O)=C(O)C=C1)C(=O)OC</chem> |
| compou nd_1 | CAH14_HUMAN      | 5                        | 9.46E-08 | 0.4167 | 3.6236  | 12.1605  | CA14    | Carbonic anhydrase 14                   | <chem>COC(=O)\C=C\C1=CC=C(O)C(O)=C1\C(=C\C1=CC(O)=C(O)C=C1)C(=O)OC</chem> |
| compou nd_1 | CAH5A_HUMAN      | 5                        | 4.89E-08 | 0.3673 | 2.2812  | 12.6748  | CA5A    | Carbonic anhydrase 5A, mitochondrial    | <chem>COC(=O)\C=C\C1=CC=C(O)C(O)=C1\C(=C\C1=CC(O)=C(O)C=C1)C(=O)OC</chem> |

|            |             |   |          |        |         |          |         |                                      |                                                                           |
|------------|-------------|---|----------|--------|---------|----------|---------|--------------------------------------|---------------------------------------------------------------------------|
| compound_1 | CAH6_HUMAN  | 5 | 1.80E-10 | 0.3673 | 2.6266  | 17.0452  | CA6     | Carbonic anhydrase 6                 | <chem>COC(=O)\C=C\C1=CC=C(O)C(O)=C1\C(=C\C1=CC(O)=C(O)C=C1)C(=O)OC</chem> |
| compound_1 | CAH5B_HUMAN | 5 | 1.60E-09 | 0.3673 | 2.2994  | 15.3437  | CA5B    | Carbonic anhydrase 5B, mitochondrial | <chem>COC(=O)\C=C\C1=CC=C(O)C(O)=C1\C(=C\C1=CC(O)=C(O)C=C1)C(=O)OC</chem> |
| compound_1 | CAH7_HUMAN  | 5 | 2.03E-08 | 0.4167 | 4.6487  | 13.3606  | CA7     | Carbonic anhydrase 7                 | <chem>COC(=O)\C=C\C1=CC=C(O)C(O)=C1\C(=C\C1=CC(O)=C(O)C=C1)C(=O)OC</chem> |
| compound_1 | DHB3_RAT    | 5 | 9.88E-09 | 0.3455 | 0.3455  | 13.922   | Hsd17b3 | Testosterone 17-beta-dehydrogenase 3 | <chem>COC(=O)\C=C\C1=CC=C(O)C(O)=C1\C(=C\C1=CC(O)=C(O)C=C1)C(=O)OC</chem> |
| compound_1 | DYN1_HUMAN  | 5 | 8.85E-22 | 0.3276 | 1.5788  | 37.3467  | DNM1    | Dynamin-1                            | <chem>COC(=O)\C=C\C1=CC=C(O)C(O)=C1\C(=C\C1=CC(O)=C(O)C=C1)C(=O)OC</chem> |
| compound_1 | HDAC1_MOUSE | 5 | 6.61E-06 | 0.2857 | 0.5662  | 8.8493   | Hdac1   | Histone deacetylase 1                | <chem>COC(=O)\C=C\C1=CC=C(O)C(O)=C1\C(=C\C1=CC(O)=C(O)C=C1)C(=O)OC</chem> |
| compound_1 | LGUL_HUMAN  | 5 | 3.95E-23 | 0.3509 | 2.2577  | 39.7704  | GLO1    | Lactoylglutathione lyase             | <chem>COC(=O)\C=C\C1=CC=C(O)C(O)=C1\C(=C\C1=CC(O)=C(O)C=C1)C(=O)OC</chem> |
| compound_1 | LOX15_RAT   | 5 | 1.17E-30 | 0.3621 | 2.1942  | 53.2896  | Alox15  | Arachidonate lipoxygenase 15-        | <chem>COC(=O)\C=C\C1=CC=C(O)C(O)=C1\C(=C\C1=CC(O)=C(O)C=C1)C(=O)OC</chem> |
| compound_1 | LOX5_RAT    | 5 | 1.42E-20 | 0.4231 | 17.1117 | 35.1824  | Alox5   | Arachidonate lipoxygenase 5-         | <chem>COC(=O)\C=C\C1=CC=C(O)C(O)=C1\C(=C\C1=CC(O)=C(O)C=C1)C(=O)OC</chem> |
| compound_1 | LX15B_RAT   | 5 | 3.57E-65 | 0.3621 | 2.1942  | 115.2538 | Alox15b | Arachidonate lipoxygenase B 15-      | <chem>COC(=O)\C=C\C1=CC=C(O)C(O)=C1\C(=C\C1=CC(O)=C(O)C=C1)C(=O)OC</chem> |
| compound_1 | MMP1_HUMAN  | 5 | 1.60E-07 | 0.4286 | 9.3563  | 11.7507  | MMP1    | Interstitial collagenase             | <chem>COC(=O)\C=C\C1=CC=C(O)C(O)=C1\C(=C\C1=CC(O)=C(O)C=C1)C(=O)OC</chem> |
| compound_1 | MMP2_HUMAN  | 5 | 3.01E-06 | 0.4286 | 9.7746  | 9.4635   | MMP2    | 72 kDa type IV collagenase           | <chem>COC(=O)\C=C\C1=CC=C(O)C(O)=C1\C(=C\C1=CC(O)=C(O)C=C1)C(=O)OC</chem> |
| compound_1 | MMP9_HUMAN  | 5 | 5.48E-08 | 0.4286 | 10.0317 | 12.5868  | MMP9    | Matrix metalloproteinase-9           | <chem>COC(=O)\C=C\C1=CC=C(O)C(O)=C1\C(=C\C1=CC(O)=C(O)C=C1)C(=O)OC</chem> |
| compound_1 | MTSI_SPISQ  | 5 | 2.25E-20 | 0.3455 | 0.6675  | 34.8229  | sssIM   | CPG DNA methylase                    | <chem>COC(=O)\C=C\C1=CC=C(O)C(O)=C1\C(=C\C1=CC(O)=C(O)C=C1)C(=O)OC</chem> |

|            |               |   |          |        |         |         |          |                                            |                                                                           |
|------------|---------------|---|----------|--------|---------|---------|----------|--------------------------------------------|---------------------------------------------------------------------------|
| compound_1 | MYOC_HUMAN    | 5 | 5.25E-27 | 0.3333 | 0.3333  | 46.7314 | MYOC     | Myocilin                                   | <chem>COC(=O)\C=C\C1=CC=C(O)C(O)=C1\C(=C\C1=CC(O)=C(O)C=C1)C(=O)OC</chem> |
| compound_1 | NEMO_HUMAN    | 5 | 3.45E-12 | 0.3333 | 0.6364  | 20.128  | IKBK G   | NF-kappa-B essential modulator             | <chem>COC(=O)\C=C\C1=CC=C(O)C(O)=C1\C(=C\C1=CC(O)=C(O)C=C1)C(=O)OC</chem> |
| compound_1 | NF2L2_HUMAN   | 5 | 4.55E-06 | 0.3455 | 0.6788  | 9.1413  | NFE2L2   | Nuclear erythroid factor 2                 | <chem>COC(=O)\C=C\C1=CC=C(O)C(O)=C1\C(=C\C1=CC(O)=C(O)C=C1)C(=O)OC</chem> |
| compound_1 | NFKB1_HUMAN   | 5 | 1.12E-11 | 0.3455 | 0.9623  | 19.2099 | NFKB1    | Nuclear factor NF-kappa-B subunit          | <chem>COC(=O)\C=C\C1=CC=C(O)C(O)=C1\C(=C\C1=CC(O)=C(O)C=C1)C(=O)OC</chem> |
| compound_1 | O49150_SOLTU  | 5 | 2.41E-07 | 0.3673 | 0.3673  | 11.4312 |          | Lipoxygenase                               | <chem>COC(=O)\C=C\C1=CC=C(O)C(O)=C1\C(=C\C1=CC(O)=C(O)C=C1)C(=O)OC</chem> |
| compound_1 | P89582_9HIV2  | 5 | 1.57E-14 | 0.3182 | 0.3182  | 24.3352 | pol      | Integrase                                  | <chem>COC(=O)\C=C\C1=CC=C(O)C(O)=C1\C(=C\C1=CC(O)=C(O)C=C1)C(=O)OC</chem> |
| compound_1 | PAR15_HUMAN   | 5 | 3.55E-11 | 0.3276 | 0.3276  | 18.3103 | PARP15   | Protein mono-ADP-ribosyltransferase PARP15 | <chem>COC(=O)\C=C\C1=CC=C(O)C(O)=C1\C(=C\C1=CC(O)=C(O)C=C1)C(=O)OC</chem> |
| compound_1 | POL_RSVP      | 5 | 4.88E-18 | 0.2857 | 0.2857  | 30.6299 | gag-pol  | Gag-Pol polyprotein                        | <chem>COC(=O)\C=C\C1=CC=C(O)C(O)=C1\C(=C\C1=CC(O)=C(O)C=C1)C(=O)OC</chem> |
| compound_1 | PPBN_HUMAN    | 5 | 5.88E-06 | 0.3188 | 0.9153  | 8.9407  | ALPG     | Alkaline phosphatase, germ cell type       | <chem>COC(=O)\C=C\C1=CC=C(O)C(O)=C1\C(=C\C1=CC(O)=C(O)C=C1)C(=O)OC</chem> |
| compound_1 | Q26964_TRYC R | 5 | 2.83E-24 | 0.2985 | 0.2985  | 41.8277 | TCTS-154 | Trans-sialidase                            | <chem>COC(=O)\C=C\C1=CC=C(O)C(O)=C1\C(=C\C1=CC(O)=C(O)C=C1)C(=O)OC</chem> |
| compound_1 | Q7ZJM1_9HIV1  | 5 | 1.88E-29 | 0.4231 | 14.8418 | 51.1235 | pol      | Integrase                                  | <chem>COC(=O)\C=C\C1=CC=C(O)C(O)=C1\C(=C\C1=CC(O)=C(O)C=C1)C(=O)OC</chem> |
| compound_1 | Q8HY88_BOVIN  | 5 | 5.03E-14 | 0.3455 | 0.3455  | 23.4246 | KCNK2    | Potassium channel subfamily K member 2     | <chem>COC(=O)\C=C\C1=CC=C(O)C(O)=C1\C(=C\C1=CC(O)=C(O)C=C1)C(=O)OC</chem> |

|            |              |   |          |        |        |          |        |                                    |                                                              |
|------------|--------------|---|----------|--------|--------|----------|--------|------------------------------------|--------------------------------------------------------------|
| compound_1 | Q8I2J3_PLAF7 | 5 | 7.63E-09 | 0.3281 | 1.5784 | 14.123   |        | M18 aspartyl aminopeptidase        | COC(=O)\C=C\C1=CC=C(O)C(O)=C1\C(=C\C1=CC(O)=C(O)C=C1)C(=O)OC |
| compound_1 | SDF1_HUMAN   | 5 | 1.05E-63 | 0.3214 | 3.4974 | 112.6199 | CXCL12 | Stromal cell-derived factor 1      | COC(=O)\C=C\C1=CC=C(O)C(O)=C1\C(=C\C1=CC(O)=C(O)C=C1)C(=O)OC |
| compound_1 | T23O_MOUSE   | 5 | 9.88E-07 | 0.3333 | 0.3333 | 10.3317  | Tdo2   | Tryptophan 2,3-dioxygenase         | COC(=O)\C=C\C1=CC=C(O)C(O)=C1\C(=C\C1=CC(O)=C(O)C=C1)C(=O)OC |
| compound_1 | TAU_HUMAN    | 5 | 1.68E-27 | 0.3607 | 5.4569 | 47.6208  | MAPT   | Microtubule-associated protein tau | COC(=O)\C=C\C1=CC=C(O)C(O)=C1\C(=C\C1=CC(O)=C(O)C=C1)C(=O)OC |
| compound_1 | TBB1_HUMAN   | 5 | 5.80E-09 | 0.3115 | 0.8825 | 14.3374  | TUBB1  | Tubulin beta-1 chain               | COC(=O)\C=C\C1=CC=C(O)C(O)=C1\C(=C\C1=CC(O)=C(O)C=C1)C(=O)OC |
| compound_1 | TF65_HUMAN   | 5 | 5.15E-06 | 0.3529 | 0.9372 | 9.0443   | RELA   | Transcription factor p65           | COC(=O)\C=C\C1=CC=C(O)C(O)=C1\C(=C\C1=CC(O)=C(O)C=C1)C(=O)OC |
| compound_1 | TLR4_MOUSE   | 5 | 6.56E-44 | 0.3455 | 4.2828 | 77.0775  | Tlr4   | Toll-like receptor 4               | COC(=O)\C=C\C1=CC=C(O)C(O)=C1\C(=C\C1=CC(O)=C(O)C=C1)C(=O)OC |
| compound_1 | TTHY_HUMAN   | 5 | 2.52E-07 | 0.3559 | 1.0079 | 11.3953  | TTR    | Transthyretin                      | COC(=O)\C=C\C1=CC=C(O)C(O)=C1\C(=C\C1=CC(O)=C(O)C=C1)C(=O)OC |
| compound_1 | XDH_BOVIN    | 5 | 8.85E-06 | 0.3774 | 2.9565 | 8.6218   | XDH    | Xanthine dehydrogenase/oxidase     | COC(=O)\C=C\C1=CC=C(O)C(O)=C1\C(=C\C1=CC(O)=C(O)C=C1)C(=O)OC |
| compound_1 | XDH_HUMAN    | 5 | 4.16E-07 | 0.3016 | 1.4607 | 11.0052  | XDH    | Xanthine dehydrogenase/oxidase     | COC(=O)\C=C\C1=CC=C(O)C(O)=C1\C(=C\C1=CC(O)=C(O)C=C1)C(=O)OC |

---

**Supplemental Table S2. The targets of SuperPhred in this study**

| Targets                                                                | ChEMBL-ID     | UniProt ID | PDB           | TTD ID        | Possibility | Accuracy |
|------------------------------------------------------------------------|---------------|------------|---------------|---------------|-------------|----------|
| DNA-(apurinic or apyrimidinic site) lyase                              | CHEMBL5619    | P27695     | 6BOW          | T13348        | 99.63%      | 91.11%   |
| Monoamine oxidase A MAO                                                | CHEMBL1951    | P21397     | 2Z5Y          | Not Available | 97.73%      | 91.49%   |
| Arachidonate 12-lipoxygenase ALOX12                                    | CHEMBL3687    | P18054     | 3D3L          | Not Available | 94.55%      | 75.57%   |
| Tyrosyl-DNA phosphodiesterase 1 TDP1                                   | CHEMBL1075138 | Q9NUW8     | 6N0D          | Not Available | 92.28%      | 71.22%   |
| Kruppel-like factor 5 KLF5                                             | CHEMBL1293249 | Q13887     | Not Available | Not Available | 92.16%      | 86.33%   |
| <a href="#">Nuclear factor erythroid 2-related factor 2</a><br>NRF2    | CHEMBL1075094 | Q16236     | 2FLU          | Not Available | 90.94%      | 96%      |
| Transthyretin TTR                                                      | CHEMBL3194    | P02766     | 6SUG          | T86462        | 90.61%      | 90.71%   |
| Pregnane X receptor PXR                                                | CHEMBL3401    | O75469     | 6TFI          | T82702        | 90.34%      | 94.73%   |
| Transcription intermediary factor 1-alpha<br>TIF-1a                    | CHEMBL3108638 | O15164     | 4YBM          | Not Available | 89.31%      | 95.56%   |
| Proteasome component C5                                                | CHEMBL4208    | P20618     | 6KWY          | Not Available | 88.97%      | 90%      |
| DNA topoisomerase II alpha TOP2A                                       | CHEMBL1806    | P11388     | 6ZY5          | T17048        | 88.74%      | 89%      |
| Dual specificity protein kinase CLK4                                   | CHEMBL4203    | Q9HAZ1     | 6FYV          | Not Available | 88.22%      | 94.45%   |
| Nuclear factor NF-kappa-B p105 subunit NK-<br>KB P105                  | CHEMBL3251    | P19838     | 1SVC          | Not Available | 88.13%      | 96.09%   |
| Beta-glucuronidase                                                     | CHEMBL2728    | P08236     | 3HN3          | T96413        | 87.91%      | 77.68%   |
| Signal transducer and activator of transcription<br>1-alpha/beta STAT1 | CHEMBL6101    | P42224     | 1YVL          | T64205        | 84.81%      | 72.62%   |
| Macrophage migration inhibitory factor<br>MIF                          | CHEMBL2085    | P14174     | 6B1K          | T39977        | 84.74%      | 80.78%   |
| Thyroid hormone receptor alpha                                         | CHEMBL1860    | P10827     | 3ILZ          | T79591        | 81.74%      | 99.15%   |
| Cathepsin D                                                            | CHEMBL2581    | P07339     | 4OD9          | T67102        | 81.32%      | 98.95%   |
| Glycine transporter 2 GLYT-2                                           | CHEMBL3060    | Q9Y345     | Not Available | Not Available | 81.29%      | 99.17%   |
| Cytochrome P450 3A4                                                    | CHEMBL340     | P08684     | 5VCC          | T37848        | 79.26%      | 91.19%   |
| Nuclear receptor ROR-beta                                              | CHEMBL3091268 | Q92753     | Not Available | Not Available | 79.17%      | 95.50%   |
| Cyclin-dependent kinase 5                                              | CHEMBL4036    | Q00535     | 4AU8          | T20973        | 78.49%      | 79.09%   |

|                                                                       |               |        |               |               |        |        |
|-----------------------------------------------------------------------|---------------|--------|---------------|---------------|--------|--------|
| Endoplasmic reticulum-associated amyloid beta-peptide-binding protein | CHEMBL4159    | Q99714 | 2O23          | Not Available | 77.71% | 70.16% |
| Serine/threonine-protein kinase/endoribonuclease IRE1                 | CHEMBL1163101 | O75460 | 6W39          | Not Available | 76.85% | 98.11% |
| G protein-coupled receptor kinase 5                                   | CHEMBL5678    | P34947 | 4TND          | Not Available | 76.61% | 88%    |
| Protein tyrosine kinase 2 beta                                        | CHEMBL5469    | Q14289 | 4EKU          | T07087        | 75.85% | 91.03% |
| Serine/threonine-protein kinase PLK4                                  | CHEMBL3788    | O00444 | 3COK          | Not Available | 75.55% | 83.65% |
| Glycine receptor subunit alpha-1                                      | CHEMBL5845    | P23415 | 4X5T          | T50269        | 74.76% | 90.71% |
| Platelet-derived growth factor receptor alpha                         | CHEMBL2007    | P16234 | 7LBF          | T53524        | 73.57% | 91.07% |
| Protein-tyrosine phosphatase 2C                                       | CHEMBL3864    | Q06124 | 5EHR          | T13057        | 73.40% | 94.42% |
| G-protein coupled receptor 6                                          | CHEMBL3714130 | P46095 | Not Available | Not Available | 73.22% | 97.36% |
| Cyclin-dependent kinase 2/cyclin E1                                   | CHEMBL1907605 | P24864 | 1W98          | T70176        | 73.14% | 92.88% |
| Neuronal acetylcholine receptor; alpha4/beta4                         | CHEMBL1907591 | P30926 | 6UR8          | T70967        | 72.48% | 100%   |
| PI3-kinase p110-alpha/p85-alpha                                       | CHEMBL2111367 | P27986 | 4JPS          | T80276        | 72.25% | 94.33% |
| Glucose transporter                                                   | CHEMBL2535    | P11166 | 6THA          | Not Available | 71.69% | 98.75% |
| C-C chemokine receptor type 2                                         | CHEMBL4015    | P41597 | 5T1A          | T89988        | 71.60% | 98.57% |
| Glutaminase kidney isoform, mitochondrial                             | CHEMBL2146302 | O94925 | 3UO9          | T86734        | 70.98% | 100%   |
| Excitatory amino acid transporter 1                                   | CHEMBL3085    | P43003 | 5LM4          | Not Available | 70.22% | 94.67% |
| ADAM10                                                                | CHEMBL5028    | O14672 | 6BE6          | T31902        | 70%    | 97.50% |
| Sodium channel protein type III alpha subunit                         | CHEMBL5163    | Q9NY46 | Not Available | T76937        | 69.80% | 96.90% |
| Proteasome Macropain subunit                                          | CHEMBL3492    | P49721 | 5LE5          | Not Available | 68.83% | 90.24% |
| TRAF2- and NCK-interacting kinase                                     | CHEMBL4527    | Q9UKE5 | 2X7F          | Not Available | 66.99% | 70%    |
| Phosphodiesterase 3B                                                  | CHEMBL290     | Q13370 | 1SO2          | Not Available | 66.59% | 94%    |
| Vascular endothelial growth factor receptor 1                         | CHEMBL1868    | P17948 | 5T89          | Not Available | 66.56% | 96.47% |
| Ephrin type-B receptor 2                                              | CHEMBL3290    | P29323 | 3ZFM          | T73756        | 66.18% | 78%    |
| BMP-2-inducible protein kinase                                        | CHEMBL4522    | Q9NSY1 | 4W9W          | Not Available | 65.57% | 78.11% |
| Photoreceptor-specific nuclear receptor                               | CHEMBL4374    | Q9Y5X4 | 4LOG          | Not Available | 64.89% | 85%    |
| Casein kinase II alpha/beta                                           | CHEMBL3038477 | P67870 | 6TLS          | T51565        | 64.77% | 99.23% |
| Serotonin 2c (5-HT2c) receptor                                        | CHEMBL225     | P28335 | 6BQH          | T83813        | 64.20% | 89.62% |
| Serine/threonine protein kinase NLK                                   | CHEMBL5364    | Q9UBE8 | Not Available | Not Available | 63.76% | 79%    |

|                                                                  |               |        |               |               |        |        |
|------------------------------------------------------------------|---------------|--------|---------------|---------------|--------|--------|
| Glutamate receptor ionotropic, AMPA 2                            | CHEMBL4016    | P42262 | 2WJW          | T42392        | 63.44% | 86.92% |
| Dual specificity protein kinase CLK1                             | CHEMBL4224    | P49759 | 6KHD          | Not Available | 62.92% | 85.30% |
| Platelet-derived growth factor receptor                          | CHEMBL2095189 | P09619 | 3MJG          | T53524        | 62.37% | 71.67% |
| NT-3 growth factor receptor                                      | CHEMBL5608    | Q16288 | 6KZD          | Not Available | 62.29% | 95.89% |
| Lipoxin A4 receptor                                              | CHEMBL4227    | P25090 | 6OMM          | Not Available | 61.21% | 100%   |
| P2X purinoceptor 4                                               | CHEMBL2104    | Q99571 | Not Available | T60330        | 61.13% | 97.50% |
| Excitatory amino acid transporter 3                              | CHEMBL2721    | P43005 | 6X2L          | Not Available | 61.05% | 93.50% |
| Peptidyl-prolyl cis-trans isomerase NIMA-interacting 1           | CHEMBL2288    | Q13526 | 1PIN          | T16308        | 60.84% | 91.71% |
| Lysosomal Pro-X carboxypeptidase                                 | CHEMBL2335    | P42785 | 3N2Z          | Not Available | 60.61% | 100%   |
| C-C chemokine receptor type 1                                    | CHEMBL2413    | P32246 | Not Available | T16016        | 60.45% | 89.50% |
| Vasopressin V1b receptor                                         | CHEMBL1921    | P47901 | Not Available | Not Available | 60.32% | 92.50% |
| NADPH oxidase 1                                                  | CHEMBL1287628 | Q9Y5S8 | Not Available | Not Available | 60.06% | 95.48% |
| Dipeptidyl peptidase II                                          | CHEMBL3976    | Q9UHL4 | 4EBB          | Not Available | 60.05% | 92.29% |
| Serine/threonine-protein kinase TAO1                             | CHEMBL5261    | Q7L7X3 | Not Available | Not Available | 59.63% | 89.33% |
| Dual-specificity tyrosine-phosphorylation regulated kinase 1A    | CHEMBL2292    | Q13627 | 6S14          | T92803        | 59.52% | 93.24% |
| AMP-activated protein kinase, alpha-1 subunit                    | CHEMBL4045    | Q13131 | 6C9H          | Not Available | 58.85% | 73.50% |
| Muscarinic acetylcholine receptor M3                             | CHEMBL245     | P20309 | Not Available | T67684        | 58.77% | 97.53% |
| Nuclear receptor subfamily 4 group A member 1                    | CHEMBL1293229 | P22736 | 4RZF          | Not Available | 58.73% | 78%    |
| Tyrosine-protein kinase receptor RET                             | CHEMBL2041    | P07949 | 6Q2O          | T60631        | 58.56% | 91.79% |
| Cystic fibrosis transmembrane conductance regulator              | CHEMBL4051    | P13569 | 6MSM          | T55654        | 58.52% | 95.71% |
| Galectin-3                                                       | CHEMBL4531    | P17931 | 6FOF          | T72038        | 58.46% | 96.90% |
| Dual specificity phosphatase Cdc25B                              | CHEMBL4804    | P30305 | 1QB0          | Not Available | 58.20% | 79.50% |
| Cytochrome P450 2A6                                              | CHEMBL5282    | P11509 | 2FDV          | T06455        | 58.03% | 71.78% |
| Ectonucleotide pyrophosphatase/phosphodiesterase family member 1 | CHEMBL5925    | P22413 | 6WFJ          | Not Available | 57.47% | 92.38% |
| G-protein coupled receptor 55                                    | CHEMBL1075322 | Q9Y2T6 | Not Available | T87670        | 57.37% | 78.15% |
| Excitatory amino acid transporter 2                              | CHEMBL4973    | P43004 | Not Available | Not Available | 56.87% | 98.75% |

|                                                     |               |        |               |               |        |        |
|-----------------------------------------------------|---------------|--------|---------------|---------------|--------|--------|
| Glutathione S-transferase Pi                        | CHEMBL3902    | P09211 | 5J41          | T21669        | 56.64% | 93.81% |
| Cyclin-dependent kinase 1/cyclin B1                 | CHEMBL1907602 | P06493 | 6GU2          | T49898        | 56.60% | 91.24% |
| G-protein coupled bile acid receptor 1              | CHEMBL5409    | Q8TDU6 | 7CFM          | T86273        | 56.34% | 93.65% |
| Kallikrein 7                                        | CHEMBL2443    | P49862 | 2QXI          | Not Available | 55.84% | 94%    |
| Acetyl-CoA carboxylase 2                            | CHEMBL4829    | O00763 | 3TDC          | T08922        | 55.82% | 98%    |
| G-protein coupled receptor 35                       | CHEMBL1293267 | Q9HC97 | Not Available | Not Available | 55.80% | 89.34% |
| Coagulation factor XIII                             | CHEMBL4530    | P00488 | 4KTY          | Not Available | 55.74% | 96%    |
| Arachidonate 5-lipoxygenase                         | CHEMBL215     | P09917 | 3V98          | Not Available | 55.60% | 92.68% |
| Formyl peptide receptor 1                           | CHEMBL3359    | P21462 | Not Available | T87831        | 55.58% | 93.56% |
| Dopamine D1 receptor                                | CHEMBL2056    | P21728 | 7JVP          | Not Available | 55.12% | 91%    |
| Ribosomal protein S6 kinase alpha 3                 | CHEMBL2345    | P51812 | 4D9T          | Not Available | 55.06% | 95.64% |
| Serine/threonine-protein kinase mTOR                | CHEMBL2842    | P42345 | 6BCX          | T75243        | 55.02% | 92.78% |
| Aldose reductase                                    | CHEMBL1900    | P15121 | 1US0          | T26623        | 55%    | 92.38% |
| Acetylcholine receptor;<br>alpha1/beta1/delta/gamma | CHEMBL1907588 | P02708 | 5HBT          | T04689        | 54.61% | 98.33% |
| Serine/threonine-protein kinase ULK3                | CHEMBL5047    | Q6PHR2 | 6FDY          | Not Available | 54.47% | 78.50% |
| C5a anaphylatoxin chemotactic receptor              | CHEMBL2373    | P21730 | 6C1R          | T15439        | 54.37% | 92.62% |
| Dual specificity protein phosphatase 3              | CHEMBL2635    | P51452 | 3F81          | Not Available | 54.03% | 94%    |
| Endoplasmic reticulum aminopeptidase 1              | CHEMBL5939    | Q9NZ08 | 6Q4R          | Not Available | 53.92% | 100%   |
| Quinone reductase 2                                 | CHEMBL3959    | P16083 | 4FGL          | T75498        | 53.63% | 89.49% |
| Activin receptor type-1B                            | CHEMBL5310    | P36896 | Not Available | Not Available | 52.87% | 70%    |
| Angiotensin-converting enzyme                       | CHEMBL1808    | P12821 | 5AMB          | T82577        | 52.23% | 93.39% |
| Tissue factor pathway inhibitor                     | CHEMBL3713062 | P10646 | 5NMV          | T78890        | 51.43% | 97.33% |
| P2X purinoceptor 7                                  | CHEMBL4805    | Q99572 | Not Available | T63414        | 50.98% | 97.50% |

## SMILES data

### The data of SMILES

The webtool is described in detail here: [SwissTargetPrediction: updated data and new features for efficient prediction of protein targets of small molecules](#), *Nucl. Acids Res.* (2019). For technical information about the prediction algorithm, you can refer to: [Shaping the interaction landscape of bioactive molecules](#), *Bioinformatics* (2013) 29:3073-3079.

**Select a species**

☒ Homo sapiens  
☐ Mus musculus  
☐ Rattus norvegicus

**Paste a SMILES in this box, or draw a molecule**

COC(=O)C=C1C=CC=C(O)C(O)=C1C(=C1C(=CC(=O)C=C(O)C=C1 =

Examples:

(Can take up to one minute)

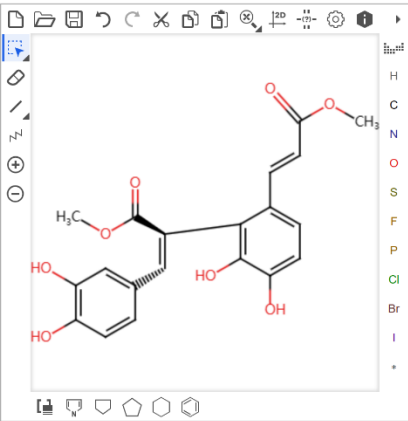

POWERED BY ChemAxon

## 2. The cytotoxicity assessment of DMB.

We did experiment to assess the cytotoxicity of DMB in cells, and the results showed that 10, 20, 30, 60, and 100 µg/mL of DMB did not have cytotoxicity to MHCC-97H and 293T cells (Supplemental figure 1). In vitro study, treatment of 45 mg/kg DMB did not induce significant changes of liver tissues (Supplemental figure 2) through histological analysis of the liver tissues.

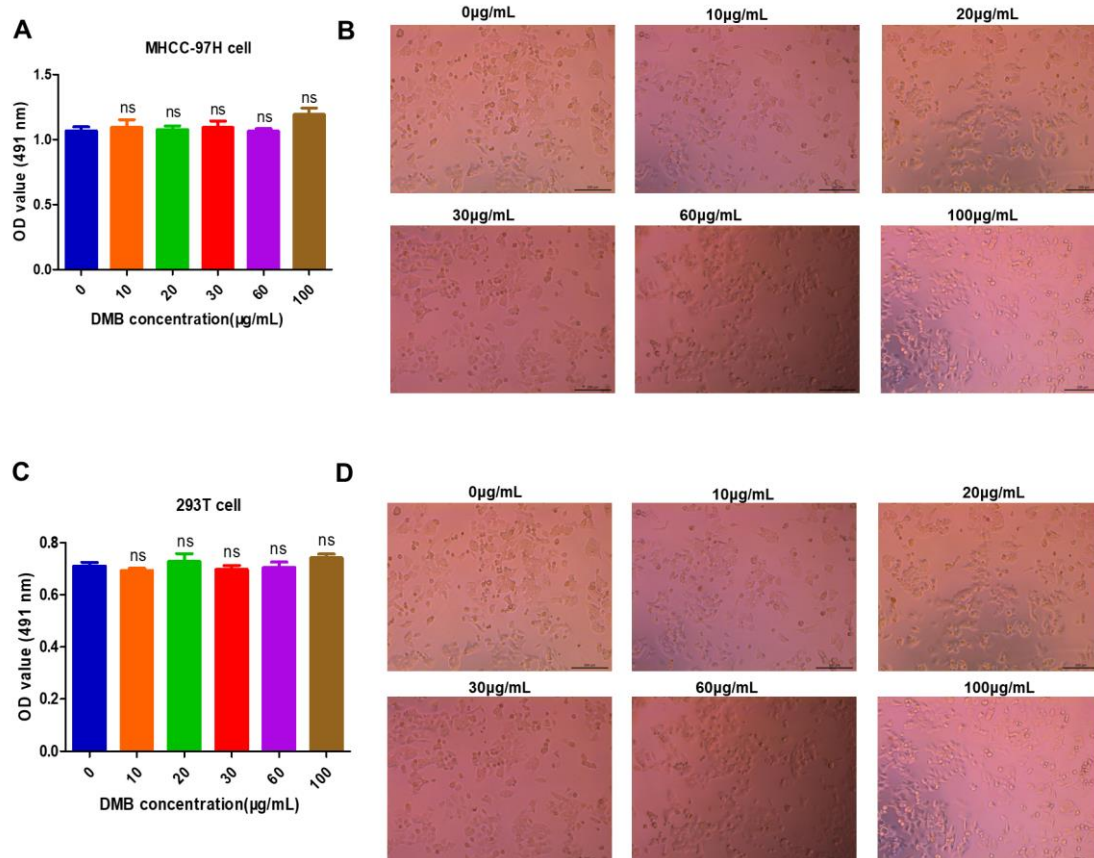

**Supplemental Figure S1.** Cytotoxicity analysis of DMB in vitro.

(A, B) MTT and Microscopic observation results showed that 10 to 100  $\mu\text{g/mL}$  DMB did not have cytotoxicity to MHCC-97H, respectively.

(C,D) MTT and Microscopic observation results showed that 10 to 100  $\mu\text{g/mL}$  of DMB did not significantly affect the growth of 293T cells, respectively.

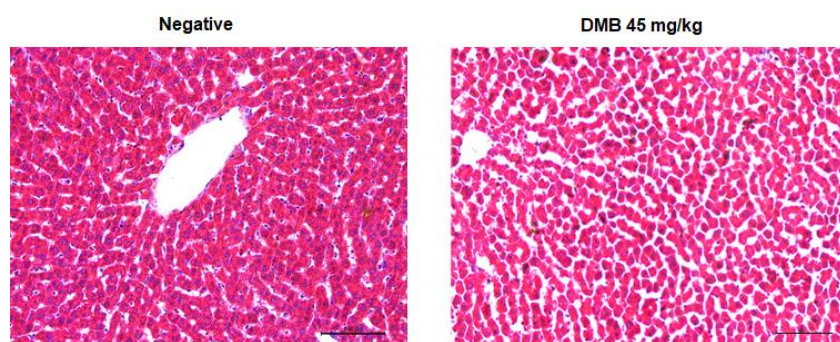

**Supplemental Figure S2.** Histological changes of liver tissues of model rats induced by DMB.

### 3. Supplemental methods

#### 3.1 ALT analysis by alanine substrate method.

ALT detection was using the alanine substrate method with Alanine Aminotransferase Kit (H001, Meikang Biotechnology Co., Ltd.) in accordance with the manufacturer's instructions. The amino group from alanine is transferred to  $\alpha$ -ketoglutaric acid under the catalysis of ALT, which produces pyruvic acid. Pyruvic acid reacts with NADH to produce lactic acid. NADH absorbance is detected by rate method at 340nm to reflect the ALT activity.

Mixed 200  $\mu$ L reagent 1 (Trihydroxymethylaminomethane buffer, NADH, lactate dehydrogenase, sodium azide) and 15  $\mu$ L sera and incubated at 37 °C, 3 min. Added another 100  $\mu$ L reagent 2 (L-alanine,  $\alpha$ -ketoglutaric acid, sodium azide), mixed well and incubated at 37 °C, 1min. The absorbance was detected at 340nm to calculate ALT activity.

#### 3.2 AST analysis by aspartate substrate method.

AST analysis was using the aspartate substrate method with Aspartate Aminotransferase Kit (H002, Meikang Biotechnology Co., Ltd.) in accordance with the manufacturer's instructions.

AST catalyzes aspartic acid and  $\alpha$ -ketoglutarate to produce oxaloacetic acid and glutamic acid. The oxaloacetic acid is changed to malic acid by malic dehydrogenase. At the same time, the coenzyme I (NADH) is oxidized to NAD<sup>+</sup>. the activity of AST in the sample can be calculated rate method at 340nm with a decrease in absorbance.

Mixed 200  $\mu$ L reagent 1 (Trihydroxymethylaminomethane buffer (pH 7.6),  $\alpha$ -ketoglutaric acid, NADH, LDH, MDH, sodium azide) and 15  $\mu$ L sera and incubated at 37 °C, 3 min. Added another 100  $\mu$  L Reagent 2 (L-alanine, sodium azide), mixed well and incubated at 37 °C, 1.5 min. The absorbance was detected at 340nm to calculate AST activity.

#### 3.3 Alkaline phosphatase assay

ALP analysis was using NPP substrate method with Alkaline Phosphatase Kit (H003, Meikang Biotechnology Co., Ltd.) in accordance with the manufacturer's instructions. Under the action of ALP, disodium p-nitrophenylphosphate and 2-amino-2-methyl-

propanol would generate 4-nitrophenol and 2A2M1P phosphate. With the action of ALP, disodium p-nitrophenylphosphate and H<sub>2</sub>O would generate 4-nitrophenol and phosphate. ALP activity was calculated by assessing the generation rate of 4-nitrophenol at 405nm.

Added 6 µL sera into 240 µL Reagents 1 (2A2M1P, magnesium acetate, EDTA, zinc sulfate), mixed and incubated at 37 °C for 3 min. Added 60 µL Reagent 2 (4-NPP), mixed and incubated at 37 °C, 1 min. The absorbance was monitored at 405nm to calculate ALP activity.

#### *3.4 Detection principle: Lactic acid substrate method*

ALP analysis was using NPP substrate method with Lactate dehydrogenase Kit (H008, Meikang Biotechnology Co., Ltd.) in accordance with the manufacturer's instructions. Lactate dehydrogenase catalyzes lactic acid to produce pyruvate, and NAD<sup>+</sup> is reduced to NADH. The rate of increase is proportional to the LDH activity in absorbance at 340nm.

Added 6 µL sera into 200 µL Reagents 1 (N-acetyl-D-glucamine buffer, L-lithium lactate), mixed and incubated at 37 °C for 3 min. Added 100µL Reagent 2 (NAD<sup>+</sup>), mixed and incubated at 37 °C, 1.5 min. The absorbance was monitored at 340nm to calculate LDH activity.

#### *3.5 TBIL detection*

TBIL was detected using TBIL Kit (60152901, DiaSys Diagnostic Systems GmbH, Germany) in accordance with the manufacturer's instructions. The total bilirubin in the sample with 2,4-dichloroaniline diazonium salt can form a diazo compound and turn red, which is proportional to the total bilirubin content and be detected at 546nm.

Added 25 µL sera into 1mL of reagent 1 (Phosphate buffer, sodium chloride, surfactant/stabilizer), mixed, and incubated at 37 °C, 5 min. Added another 250 µL Reagent 2 (2,4-dichloroaniline diazonium salt, hydrochloric acid, surfactant) at 37 °C, 5 min. the absorbance was read at 546nm to reflect TBIL.

#### *3.6 DBIL detection*

DBIL was detected using DBIL Kit (60152900, DiaSys Diagnostic Systems GmbH, Germany) in accordance with the manufacturer's instructions.

Added 100  $\mu\text{L}$  sera into 1 mL of Reagent 1 (EDTA- $\text{Na}_2$ , sodium chloride, amino sulfonic acid), mixed, and incubated at 37  $^{\circ}\text{C}$ , 5 min. Added another 250  $\mu\text{L}$  Reagent 2 (2,4-dichloroaniline diazonium salt, hydrochloric acid, EDTA- $\text{Na}_2$ ) at 37  $^{\circ}\text{C}$ , 5 min. the absorbance was read at 546nm to reflect TBIL.
